# Supplementary material for: Determinants of physical activity satisfaction and digital health adoption in UK adults: results from the 7PSC Study
Source: Research Square preprint supplement (doi:10.21203/rs.3.rs-8049011/v1), 2025-11-20
Supplement: Supplementary file 1 [file 6573cea9b659c75dda237f4f.docx]

**Supplementary**

**Generation of Barrier Score:**

A composite barrier countis formed by summing the 8 binary barrier indicators for each participant, yielding a score from 0-8 (no barriers - all barriers present).

This quantifies how many distinct obstacles to physical activity each participant experiences. Only 6.5% (n=100) of participants reported no barriers, indicating that nearly everyone faces at least one obstacle. One barrier was most common, endorsed by 33.3% (n=510) and two barriers by 28.7% (n=439). Together, those with one or two barriers comprise 68.47% of the sample, suggesting a moderate burden for the majority. A substantial minority (25.5%, n=391) reported three barriers, reflecting a higher barrier load. While reporting four or more barriers was increasingly rare (4 barriers: 4.2%, n=64; 5 barriers: 1.2%, n=19; 6 barriers: 0.5%, n=7; all 8 barriers: 0.1%, n=2), showing that very high barrier counts are uncommon.

**S Table 2. Distribution of Composite Barrier Count Score**

| **Barrier Count (0–8)** | **Frequency** | **Percent** | **Cumulative %** |
| --- | --- | --- | --- |
| 0 | 100 | 6.53% | 6.53% |
| 1 | 510 | 33.29% | 39.82% |
| 2 | 439 | 28.66% | 68.47% |
| 3 | 391 | 25.52% | 93.99% |
| 4 | 64 | 4.18% | 98.17% |
| 5 | 19 | 1.24% | 99.41% |
| 6 | 7 | 0.46% | 99.87% |
| 8 | 2 | 0.13% | 100.00% |

Summary: mean=1.94, SD=1.12, range 0–8.

**Exploring the barriers that affect the satisfaction of PA:**

To understand which barrier affects satisfaction more, we run ordinal logistic models examining each barrier’s unique contribution to physical activity satisfaction, lack of motivation was the strongest predictor of lower satisfaction (OR=0.320, p<0.001), followed by poor physical health (OR=0.233, p<0.001). Mental health barriers (OR=0.535, p=0.001) and uncertainty about what to do (OR=0.545, p=0.001) were also significantly associated with reduced odds of higher satisfaction.

In contrast, time constraints (OR=0.852, p=0.199), cost (OR=0.815, p=0.182), lack of access to facilities (OR=0.950, p=0.772) and safety concerns (OR=0.813, p=0.475) did not reach statistical significance.

**S Table 3: Barriers as predictors of physical activity satisfaction**

|  | **Adjusted OR** | **P value*** | **95% Confidence Interval** |
| --- | --- | --- | --- |
| **Lack of time** | 0.852 | 0.199 | [0.668, 1.087] |
| **Cost or affordability** | 0.815 | 0.182 | [0.604, 1.100] |
| **Lack of motivation** | 0.320 | <0.001* | [0.251, 0.407] |
| **Poor physical health** | 0.233 | <0.001* | [0.157, 0.346] |
| **Mental health barriers** | 0.535 | 0.001* | [0.373, 0.768] |
| **Lack of access to facilities** | 0.950 | 0.772 | [0.672, 1.342] |
| **Not knowing what to do** | 0.545 | 0.001* | [0.381, 0.778] |

**How barrier affect satisfaction differently by readiness?**

Examining how the effect of each additional barrier on the probability of physical activity (PA) satisfaction varies by participants’ readiness levels, the average marginal effects reveal a clear, moderation pattern:

At a **readiness score of 3**, each additional barrier is associated with a 9.96% decrease in the probability of PA satisfaction (dy/dx=–0.0996, p<0.001). This indicates that among individuals with low readiness, even a single extra barrier substantially undermines satisfaction.

At a **readiness score of 7**, the negative impact intensifies: each additional barrier corresponds to a 12.87% reduction in PA satisfaction probability (dy/dx=–0.1287, p <0.001). This suggests that moderate readiness amplifies sensitivity to barriers.

At a **readiness score of 10**, the effect size remains similarly large (dy/dx=–0.1320, p<0.001), indicating that even highly ready individuals experience significant declines in satisfaction with each added barrier. This indicate that detrimental influence of barriers on PA satisfaction does not diminish at higher readiness levels; however, individuals with greater readiness experience even larger absolute drops in satisfaction per barrier. These findings underscore the importance of barrier reduction strategies across all readiness strata, as readiness alone does not buffer against the negative impact of perceived obstacles.

**S Table 4: Association between barrier pre-readiness and change in physical activity satisfaction**

|  | Delta-method | |  |  |
| --- | --- | --- | --- | --- |
|  | | **dy/dx†** | **P value*** | **95% Confidence Interval** |
| Readiness score=3 | | -.099 | < 0.001***** | [-0.141, -0.057] |
| Readiness score=7 | | -.128 | < 0.001***** | [-0.152, -0.105] |
| Readiness score=10 | | -.131 | < 0.001***** | [-0.175, -0.088] |

**† margins, dydx(barrier_count8) at (readiness_score=(3 7 10))**

**Exploring the Age Probability of Digital Tool Use by Age:**

The table 5 below predicted probabilities of digital tool use at selected ages, holding all other covariates at their observed values. Across the adult lifespan from 25 to 65 years, the probability of digital tool use declines from approximately 57% at age 25 to 48% at age 65. The decrease is monotonic, with each 10-year increment associated with an average absolute reduction of about 2.3% in predicted probability.

**S Table 5. Predicted Probability of Using Digital Tools by Age**

| **Age (years)** | **Predicted Probability %** | **P value** | **95% Confidence Interval** |
| --- | --- | --- | --- |
| 25 | 0.566 | < 0.001 | 0.524 – 0.608 |
| 35 | 0.544 | < 0.001 | 0.515 – 0.573 |
| 45 | 0.521 | < 0.001 | 0.496 – 0.546 |
| 55 | 0.498 | < 0.001 | 0.464 – 0.532 |
| 65 | 0.475 | < 0.001 | 0.426 – 0.525 |

## Predicted Probability of Digital Tool Use by Readiness Score:

Table 6 shows the probabilities of digital tool use at four levels of readiness score. A cross the spectrum of readiness from 1-10 (lowest - highest), the probability of digital tool use increases markedly. At the lowest readiness level, participants have a 32% chance of using digital tools, which rises to 46% at a moderate readiness score of 5. Higher readiness scores of 7 and 10 correspond to 53% and 64% probabilities, respectively. All predicted margins are statistically significant (p<0.001), indicating a robust, positive association between readiness and digital engagement. This gradient suggests that interventions enhancing readiness may substantially boost digital tool adoption.

**S Table 6. Predicted Probability of Using Digital Tools by Readiness Score**

| **Readiness Score** | **Predicted Probability %** | **P value** | **95% Confidence Interval** |
| --- | --- | --- | --- |
| 1 | 0.321 | < 0.001 | 0.240 – 0.401 |
| 5 | 0.458 | < 0.001 | 0.420 – 0.496 |
| 7 | 0.530 | < 0.001 | 0.505 – 0.556 |
| 10 | 0.635 | < 0.001 | 0.586 – 0.685 |

Logistic regression; Number of obs = 1,450, LR chi2(6) = 5.90, Prob > chi2 = 0.4344 Log likelihood = -799.55657, Pseudo R2 = 0.0037

Table S7: testing the correlation between the PA300 mins and the time/motivation barriers

| WHO-PA_300 | Odds ratio | z | P>z | [95% conf. interval] | |
| --- | --- | --- | --- | --- | --- |
| Age | .9946691 | -1.08 | 0.281 | .9850427 | 1.004389 |
| Gender |  |  |  |  |  |
| Male | 1.030556 | 0.24 | 0.808 | .8087995 | 1.313113 |
| Other | 1 |  |  |  |  |
| Prefer not to say | 1 |  |  |  |  |
| Education |  |  |  |  |  |
| Secondary School or equival.. | .7571423 | -1.24 | 0.215 | .4875437 | 1.175822 |
| University Degree or higher | .9799952 | -0.14 | 0.892 | .7314872 | 1.312929 |
| Barrier_time | .9403377 | -0.48 | 0.634 | .7302235 | 1.21091 |
| Barrier_motivation | 1.178156 | 1.29 | 0.198 | .9178509 | 1.512285 |
